# Supplementary material for: CRISPR/Cas9 as Tool for Functional Study of Genes Involved in Preimplantation Embryo Development
Source: PubMed Central journal article supplement (PMC4361403; doi:10.1371/journal.pone.0120501), 2015-03-16
Supplement: pone.0120501.s001.pdf [file pone.0120501.s001.pdf]

**Supplementary Table 1. Primer sequences**

|                       | Primer name                               | Direction | Sequence (5'– 3')                                                                            |
|-----------------------|-------------------------------------------|-----------|----------------------------------------------------------------------------------------------|
| <i>sgRNAs</i>         | <i>OCT4 Exon2 for Knock-out</i>           | F         | TTAATACGACTCACTATAGGAGCA<br>GAAGAGGATCACCCCTGTTTTAGA<br>GCTAGAAATAGC                         |
|                       | <i>OCT4 Exon5 for Knock-out</i>           | F         | GAAATTAATACGACTCACTATAGG<br>ATCCTTTCCTCTGGCGCCAGTTTT<br>AGAGCTAGAAATAGC                      |
|                       | <i>OCT4 Exon5 for Knock-in</i>            | F         | GAAATTAATACGACTCACTATAGG<br>CTCCCCCATGCATTCAAACCTGGTT<br>TTAGAGCTAGAAATAGC                   |
|                       | <i>T7 long</i>                            | R         | AAAAGCACCGACTCGGTGCCAC<br>TTTTTCAAGTTGATAACGGACTAG<br>CCTTATTTTAACTTGCTATTTCTAG<br>CTCTAAAAC |
|                       | <i>T7 short</i>                           | F         | GAATTAATACGACTCACTA                                                                          |
|                       | <i>T7 short</i>                           | R         | AAAAGCACCGACTCGGTGCC                                                                         |
| <i>PCR sequencing</i> | <i>OCT4 Exon2 Check-1 for knock-out</i>   | F         | ACAGATACCCCCACAGACCA                                                                         |
|                       | <i>OCT4 Exon2 Check-1 for knock-out</i>   | R         | CACATTTGGGGATGTTTCCTT                                                                        |
|                       | <i>OCT4 Exon2 Check-2 for large scale</i> | F         | GCAGTCCCAGGACATCAAAG                                                                         |
|                       | <i>OCT4 Exon5 Check-1 for knock-out</i>   | F         | CCCCTCCCAGAGCTTATGAT                                                                         |
|                       | <i>OCT4 Exon5 Check-1 for knock-out</i>   | R         | AGCCCAGAGGGGTGACAG                                                                           |
|                       | <i>OCT4 Exon5 Check-2 for large scale</i> | R         | CTTAATCCCAAAGCCCTGGT                                                                         |
|                       | <i>eGFP for knock-in</i>                  | F         | CGACAACCACTACCTGAGCA                                                                         |

| <b><i>OCT4 Exon5<br/>Check for<br/>knock-in</i></b> |                     | R         | CCCAAGAAATGGCAAAAAGA                                 |
|-----------------------------------------------------|---------------------|-----------|------------------------------------------------------|
| <b><i>qRT-PCR</i></b>                               | <b><i>Nanog</i></b> | DQ447201  | F:TTCCTTCCTCCATGGATCTG<br>R:ATCTGCTGGAGGCTGAGGTA     |
|                                                     | <b><i>CDX2</i></b>  | NM_009942 | F: GATGAGGAGCAGGCTACTGG<br>R: CAGCCAAACCAGATGATA     |
|                                                     | <b><i>OCT4</i></b>  | NM_013633 | F: CGTGGAGACTTTGCAGCCTGA<br>R: GGCGATGTAAGTGATCTGCTG |
|                                                     | <b><i>GAPDH</i></b> | AF017079  | F: GGGCATGAACCATGAGAAGT<br>R: AAGCAGGGATGATGTTCTGG   |

(F: forward. R: reverse)
